# Supplementary material
Source: publisher figshare collection journal article supplement (https://frontiersin.figshare.com/ndownloader/files/27958011)
Supplement: Supplementary file 1 [file 27958011]

## SUPPLEMENTARY MATERIAL: DETAILED RESULTS FOR MNIST DATASET

We report below the detailed evaluation of the performance for MNIST case-study with missing data patterns with  $N_S$   $W \times W$  gaps, with  $N_S = 20, 30, 6$  and  $W = 3, 3, 9$ . The results for configuration  $N_S = 30$  and  $W = 3$  are reported in the main text (Tab. I).

| New MNIST             | Model         | I-score                          | R-score                          | AE-score                         | C-score       |
|-----------------------|---------------|----------------------------------|----------------------------------|----------------------------------|---------------|
| $N_S = 20$<br>$W = 5$ | DINEOF        | -9.41%<br>(-10.95%)              | 21.54%<br>(20.48%)               | 64.36%<br>(65.11%)               | 96.23%        |
|                       | DINConvAE     | 55.98%<br>(55.39%)               | 80.98%<br>(80.58%)               | <b>93.42%</b><br><b>(92.35%)</b> | <b>98.12%</b> |
|                       | FP(1)-ConvAE  | 61.79%<br>(61.63%)               | 82.22%<br>(81.64%)               | 87.64%<br>(87.56%)               | 97.55%        |
|                       | FP(15)-ConvAE | 74.99%<br>(72.80%)               | 88.78%<br>(87.31%)               | 91.62%<br>(91.13%)               | 97.96%        |
|                       | G(14)-ConvAE  | <b>76.50%</b><br><b>(75.56%)</b> | <b>89.81%</b><br><b>(88.81%)</b> | 91.77%<br>(91.21%)               | 97.91%        |
| $N_S = 30$<br>$W = 5$ | DINEOF        | -8.86%<br>(-10.19%)              | 13.89%<br>(12.71%)               | 64.36%<br>(65.11%)               | 96.23%        |
|                       | ConvAE        | 38.32%<br>(38.16%)               | 67.42%<br>(67.32%)               | <b>93.42%</b><br><b>(92.35%)</b> | <b>98.12%</b> |
|                       | Zero-ConvAE   | 53.69%<br>(53.44%)               | 74.97%<br>(74.44%)               | 85.67%<br>(85.83%)               | 97.03%        |
|                       | FP(15)-ConvAE | 69.27%<br>(67.68%)               | 83.81%<br>(82.54%)               | 90.22%<br>(90.04%)               | 97.59%        |
|                       | G(14)-ConvAE  | <b>69.82%</b><br><b>(68.52%)</b> | <b>84.96%</b><br><b>(83.76%)</b> | 90.98%<br>(90.66%)               | 97.45%        |
| $N_S = 6$<br>$W = 9$  | DINEOF        | -37.47%<br>(-40.00%)             | 16.83%<br>(15.50%)               | 64.36%<br>(65.11%)               | 96.23%        |
|                       | ConvAE        | -27.02%<br>(-28.28%)             | 46.95%<br>(46.44%)               | <b>93.42%</b><br><b>(92.35%)</b> | <b>98.12%</b> |
|                       | Zero-ConvAE   | -9.94%<br>(-12.03%)              | 55.41%<br>(54.09%)               | 86.52%<br>(86.73%)               | 97.33%        |
|                       | FP(15)-ConvAE | <b>26.90%</b><br><b>(22.56%)</b> | <b>71.18%</b><br>(68.45%)        | 91.03%<br>(90.41%)               | 97.71%        |
|                       | G(10)-ConvAE  | 26.18%<br><b>(24.73%)</b>        | 70.70%<br><b>(69.58%)</b>        | 90.30%<br>(90.23%)               | 97.86%        |

**Table 4. Performance of AE schemes in presence of missing data for MNIST dataset:** this table complements the results reported in Tab. I for other missing data patterns, namely with  $N_S = 20, W = 5$ ,  $N_S = 30, W = 5$  and  $N_S = 6, W = 9$ . We let the reader to the main text and Tab. I for additional details.

## SUPPLEMENTARY MATERIAL: DETAILED RESULTS FOR SST CASE-STUDY

| SST         | Model                      | I-Score                   | R-score                   | AE-score                         |
|-------------|----------------------------|---------------------------|---------------------------|----------------------------------|
|             | OI                         | 67.59%<br>(57.29%)        | 70.97%<br>(61.00%)        | -                                |
| AE models   | FP(5)-EOF(20)              | 32.52%<br>(39.22%)        | 34.94%<br>(30.39%)        | 74.17%<br>(56.00%)               |
|             | FP(5)-EOF(80)              | 28.01%<br>(34.83%)        | 30.91%<br>(25.28%)        | <b>89.95%</b><br>(64.53%)        |
|             | Zero-ConvAE <sub>1</sub>   | 89.12%<br>(86.98%)        | 89.65%<br>(87.33%)        | 67.42%<br>(60.41%)               |
|             | FP(10)-ConvAE <sub>1</sub> | 87.63%<br>(85.24%)        | 89.82%<br>(87.28%)        | 83.81%<br>(77.20%)               |
|             | G(8)-ConvAE <sub>1</sub>   | 89.08%<br>(87.89%)        | 89.51%<br>(88.25%)        | 84.22%<br>(76.32%)               |
|             | Zero-ConvAE <sub>2</sub>   | 86.70%<br>(86.37%)        | 87.14%<br>(86.87%)        | 67.20%<br>(54.77%)               |
|             | FP(10)-ConvAE <sub>2</sub> | 88.71%<br>(85.02%)        | 89.14%<br>(85.49%)        | <u>86.24%</u><br><b>(80.76)</b>  |
|             | G(8)-ConvAE <sub>2</sub>   | 90.47%<br>(88.00%)        | 90.98%<br>(88.39%)        | 86.33%<br>(78.33%)               |
| GENN models | Zero-GENN <sub>1</sub>     | 85.46%<br>(79.39%)        | 86.71%<br>(80.30%)        | -94.84%<br>(-172.68%)            |
|             | FP(15)-GENN <sub>1</sub>   | 89.22%<br>(87.45%)        | 90.07%<br>(88.50%)        | <u>92.61%</u><br>(90.18%)        |
|             | G(12)-GENN <sub>1</sub>    | 89.83%<br><b>(89.16%)</b> | 90.56%<br><b>(90.00%)</b> | 92.23%<br>(90.98%)               |
|             | FP(1)-GENN <sub>2</sub>    | 86.60%<br>(77.38%)        | 87.48%<br>(78.01%)        | -141.64%<br>(-235.50%)           |
|             | FP(15)-GENN <sub>2</sub>   | <u>90.56%</u><br>(85.93%) | <u>91.33%</u><br>(87.26%) | <b>93.04%</b><br><b>(91.17%)</b> |
|             | G(12)-GENN <sub>2</sub>    | <b>91.10%</b><br>(87.98%) | <b>91.83%</b><br>(88.81%) | 92.36%<br>(90.37%)               |

**Table 5. Performance on SST dataset:** We evaluate for each model interpolation, reconstruction and auto-encoding scores, resp. I-score, R-score and AE-score, in terms of percentage of explained variance resp. for the interpolation of missing data areas, the reconstruction of the whole image with missing data and the reconstruction of gap-free images. For each model, we evaluate these score for the training data (first row) and the test dataset (second row in brackets). We consider four different auto-encoder models, namely 20 and 80-dimensional EOFs and ConvAE<sub>1,2</sub> models, and two GENN models, GENN<sub>1,2</sub>, combined with three interpolation strategies: the classic zero-filling strategy (Zero) and proposed iterative fixed-point (FP) and gradient-based (G) schemes, the figure in brackets denoting the number of iterations. For instance, FP(10)-GENN<sub>1</sub> refers to GENN<sub>1</sub> with a 10-step fixed-point interpolation scheme. The EOFs are trained from gap-free data. We also consider an Optimal Interpolation (OI) with a space-time Gaussian covariance with empirically-tuned parameters. We refer the reader to the main text for the detailed parameterization of the considered models.
